# Supplementary material for: The Clinical Utility of Optical Genome Mapping for the Assessment of Genomic Aberrations in Acute Lymphoblastic Leukemia
Source: MDPI journal article supplement (doi:10.3390/cancers13174388), 2021-08-30
Supplement: s1 [file s1]

## Supplementary Material

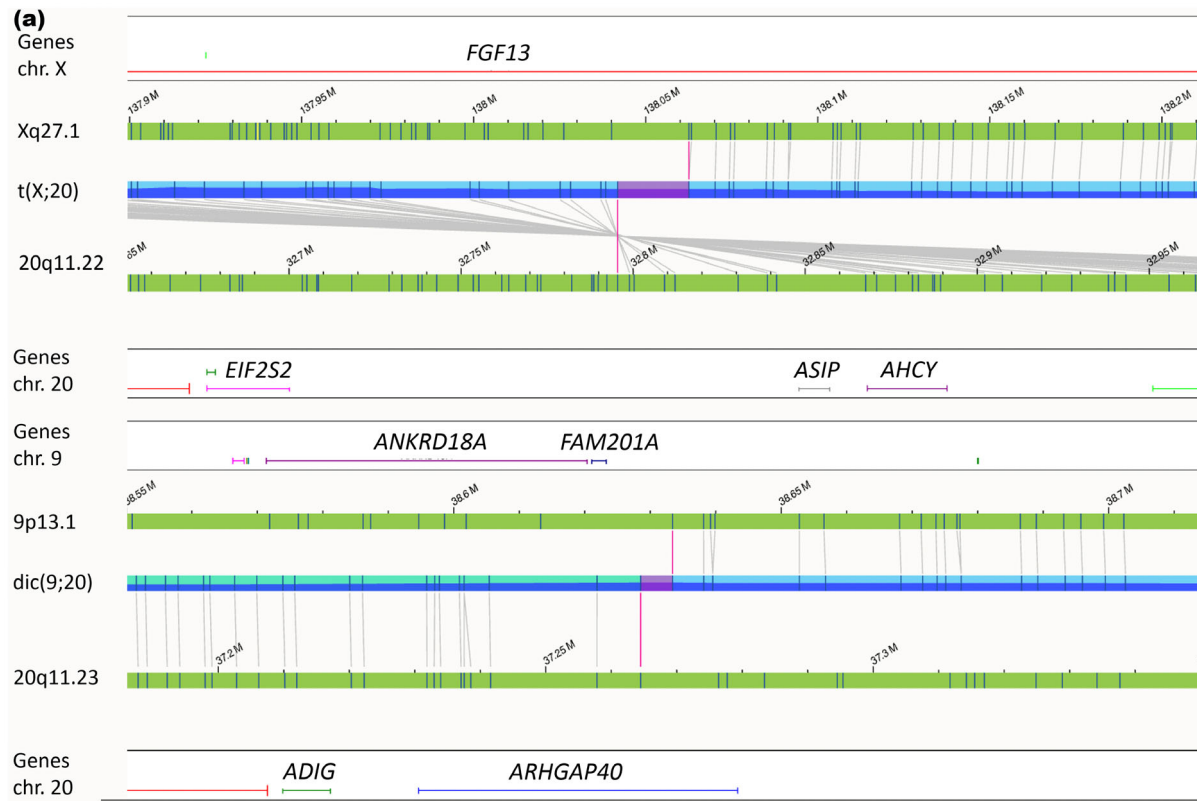

**Figure S1.** Translocations in patient 4 by means of OGM. The upper green bars indicate the reference maps. The maps of the patient are displayed in blue/turquoise; the breakpoints are marked with red lines. Genes located within the shown regions are given above or below. **(a)** Translocation t(X;20)(q27.1;q11.22), half of the patient map fits to chromosome chr Xq27.1, the other half fits to chr 20q11.22. The breakpoints occur in *FGF13* on chr X and in an intergenic region on chr 20. **(b)** Translocation dic(9;20)(p13.1;q11.23) half of the patient map fits to chromosome chr 9p13.1, the other half fits to chr 20q11.23. The breakpoints occur in an intergenic region on chr 9 and in *ARHGAP40* on chr 20.

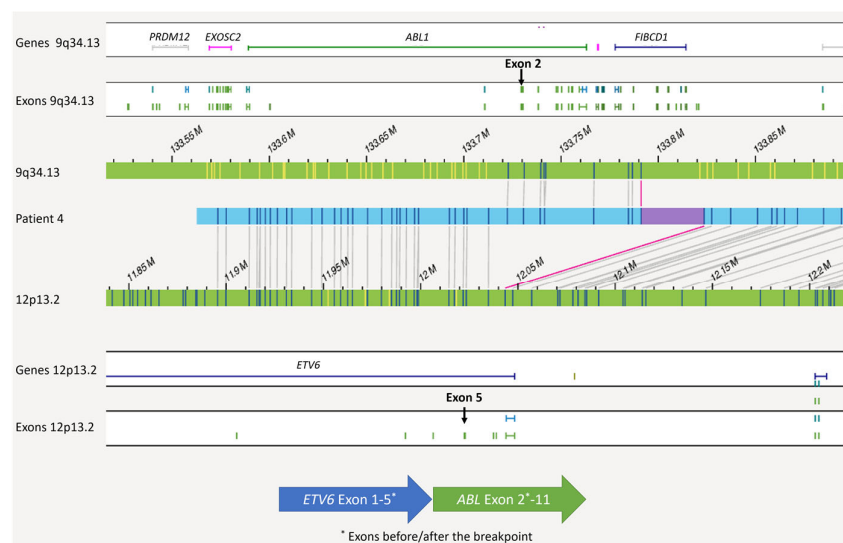

**Figure S2.** Insertion (12;9) in patient 4 by means of OGM. The green bars indicate the reference maps. The map of the patient is displayed in blue. Genes and Exons located within the shown regions are given above or below. Genomic material from chromosome 9 (133722840\_133791173) containing exon 2-11 of the *ABL* gene is inserted in chromosome 12 between position 1203481 and 1204345. The insertion is leading to a fusion of *ETV6* and *ABL1* schematically shown

below. Due to the label distribution, it is also possible that the fusion gene contains exon 6 and/or exon 7 of *ETV6*. The *de novo* assembly algorithm detected the insertion, however, the RVP was used to identify the inserted material.

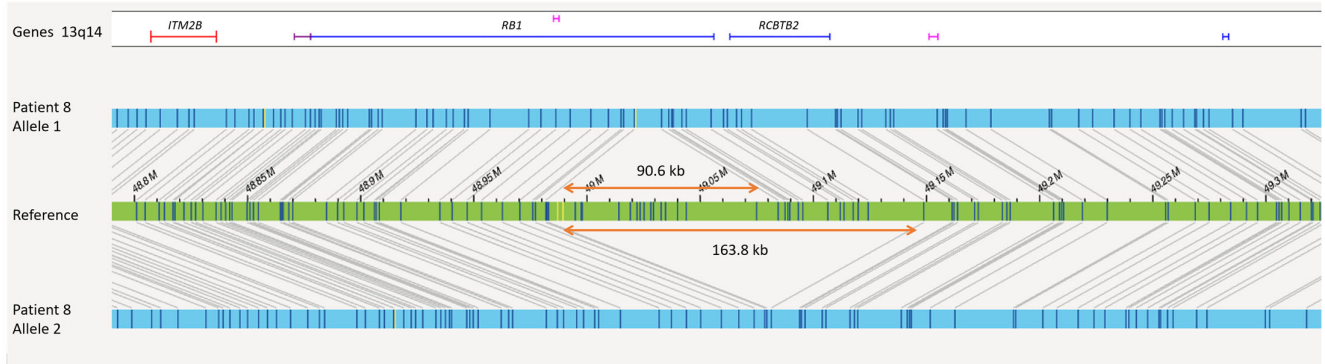

**Figure S3.** Bi-allelic deletion in *RB1* (chr 13q14) in patient 8 by means of OGM. The green bar indicates the reference map. The maps of the patient are displayed in blue. Genes located within the shown regions are given above or below. The overlapping deletions targeting *RB1* are 90.6 kb and 163.8 kb large and marked with a red arrow.

**Table S1.** Quality report of de novo assemblies.

| Sample                                               | 1      | 2      | 3      | 4      | 5      | 6     | 7     | 8     | 9     | 10    | 11    | 12    | Total                            |
|------------------------------------------------------|--------|--------|--------|--------|--------|-------|-------|-------|-------|-------|-------|-------|----------------------------------|
| Sample storage                                       | Banked | Banked | Banked | Banked | Banked | Fresh | -                                |
| Cell count [ $\times 10^6$ ]                         | 72     | 20     | 27     | 25     | 24     | 8.7   | 81    | 45    | 87    | 82    | 6.9   | 61    | $\geq 6.9$ (45 $\pm$ 30)         |
| Blasts [%]                                           | 92.5   | 91.0   | 88.0   | 94.0   | 83.0   | 77.7  | 96.1  | 50.3  | 91.0  | 75.8  | 83.5  | 79.8  | $\geq 50.3$<br>(83.6 $\pm$ 12.4) |
| Total number of molecules 150 kb [ $\times 10^6$ ]   | 1.42   | 1.52   | 1.52   | 1.48   | 1.93   | 1.94  | 1.91  | 1.55  | 1.60  | 1.35  | 2.05  | 1.95  | $\geq 1.35$<br>(1.68 $\pm$ 0.25) |
| Total length [Gb]                                    | 430    | 426    | 470    | 473    | 486    | 446   | 438   | 400   | 458   | 331   | 454   | 455   | $\geq 372$ (439 $\pm$ 41)        |
| Average length [kb]                                  | 302    | 280    | 310    | 319    | 252    | 230   | 229   | 258   | 287   | 244   | 221   | 233   | $\geq 221$ (264 $\pm$ 34)        |
| Molecule N50 [kb]                                    | 322    | 294    | 331    | 343    | 253    | 224   | 226   | 258   | 295   | 244   | 216   | 232   | $> 216$ (270 $\pm$ 45)           |
| Average label density [per 100 kb]                   | 15.6   | 15.7   | 15.5   | 15.6   | 15.5   | 15.6  | 15.3  | 15.6  | 15.2  | 15.7  | 15.7  | 15.8  | 15.2-15.8<br>(15.6 $\pm$ 0.2)    |
| Coverage of the reference [ $\times$ hg19]           | 139    | 138    | 152    | 153    | 157    | 144   | 141   | 120   | 148   | 107   | 147   | 147   | $\geq 107$ (141 $\pm$ 14)        |
| Total number of molecules aligned [ $\times 10^6$ ]  | 1.29   | 1.40   | 1.41   | 1.38   | 1.77   | 1.75  | 1.71  | 1.28  | 1.49  | 1.23  | 1.78  | 1.77  | $\geq 1.23$<br>(1.52 $\pm$ 0.22) |
| Fraction of molecules aligned                        | 0.91   | 0.92   | 0.93   | 0.93   | 0.92   | 0.91  | 0.90  | 0.87  | 0.93  | 0.91  | 0.87  | 0.91  | $\geq 0.87$<br>(0.91 $\pm$ 0.02) |
| Effective coverage of the reference [ $\times$ hg19] | 114    | 115    | 125    | 126    | 129    | 109   | 104   | 92    | 115   | 84    | 106   | 116   | $\geq 84$ (111 $\pm$ 13)         |
| Average confidence                                   | 40.9   | 39.5   | 44.0   | 46.2   | 34.6   | 33.1  | 33.0  | 33.4  | 41.7  | 36.6  | 31.2  | 33.9  | $\geq 31.2$ (37.3 $\pm$ 4.9)     |
| Diploid genome map count                             | 421    | 436    | 435    | 414    | 402    | 552   | 508   | 423   | 429   | 529   | 504   | 488   | $\geq 402$ (462 $\pm$ 51)        |
| Diploid genome map length [Gb]                       | 5.84   | 5.81   | 5.88   | 5.81   | 5.81   | 5.84  | 5.81  | 5.81  | 5.78  | 5.85  | 5.79  | 5.83  | $\geq 5.78$<br>(5.82 $\pm$ 0.03) |
| Diploid genome map N50 [Mb]                          | 70.2   | 69.8   | 59.7   | 79.9   | 59.8   | 58.2  | 59.6  | 69.6  | 58.1  | 58.5  | 58.5  | 58.5  | $\geq 58.1$ (63.4 $\pm$ 7.2)     |
| Haploid genome map count                             | 263    | 286    | 275    | 265    | 250    | 367   | 336   | 272   | 274   | 338   | 337   | 318   | $\geq 250$ (298 $\pm$ 38)        |
| Haploid genome map length [Gb]                       | 2.98   | 3.01   | 2.98   | 3.01   | 3.09   | 3.12  | 3.07  | 3.02  | 2.99  | 3.10  | 3.12  | 2.98  | $\geq 2.98$<br>(3.04 $\pm$ 0.06) |
| Haploid genome map N50 [Mb]                          | 66.5   | 62.9   | 59.7   | 73.5   | 58.4   | 58.4  | 58.5  | 59.6  | 57.3  | 55.8  | 56.8  | 58.5  | $\geq 55.8$ (60.5 $\pm$ 5.0)     |

|                                                       |               |               |               |               |               |               |               |               |               |               |               |               |                                           |
|-------------------------------------------------------|---------------|---------------|---------------|---------------|---------------|---------------|---------------|---------------|---------------|---------------|---------------|---------------|-------------------------------------------|
| Total reference length [Gb]                           | 3.10          | 3.10          | 3.10          | 3.10          | 3.10          | 3.10          | 3.10          | 3.10          | 3.10          | 3.10          | 3.10          | 3.10          | 3.10 (3.10±0.00)                          |
| Total number of genome maps aligned (fraction)        | 362<br>(0.86) | 362<br>(0.83) | 355<br>(0.82) | 336<br>(0.81) | 331<br>(0.82) | 455<br>(0.82) | 403<br>(0.79) | 334<br>(0.79) | 358<br>(0.83) | 424<br>(0.80) | 399<br>(0.79) | 386<br>(0.79) | ≥331 (≥0.79)<br>(375±39)<br>((0.81±0.02)) |
| Total unique aligned length [Gb]                      | 2.89          | 2.86          | 2.86          | 2.84          | 2.84          | 2.84          | 2.86          | 2.84          | 2.83          | 2.86          | 2.84          | 2.86          | ≥2.83<br>(2.85±0.02)                      |
| Total unique aligned length [per reference length]    | 0.92          | 0.92          | 0.92          | 0.92          | 0.92          | 0.92          | 0.92          | 0.92          | 0.92          | 0.92          | 0.92          | 0.92          | ≥0.92<br>(0.92±0.00)                      |
| Total number of molecules aligned [×10 <sup>6</sup> ] | 1.31          | 1.42          | 1.43          | 1.41          | 1.80          | 1.77          | 1.73          | 1.30          | 1.51          | 1.25          | 1.80          | 1.80          | ≥1.25<br>(1.54±0.22)                      |
| Fraction of molecules aligned                         | 0.920         | 0.936         | 0.943         | 0.950         | 0.932         | 0.914         | 0.909         | 0.888         | 0.943         | 0.920         | 0.975         | 0.923         | ≥0.888<br>(0.929±0.022)                   |
| Effective coverage of assembly [×]                    | 74.1          | 76.6          | 82.0          | 83.3          | 88.7          | 73.7          | 71.5          | 61.8          | 77.1          | 55.6          | 74.0          | 79.5          | ≥55.6 (74.8±9.0)                          |
| Average confidence                                    | 54.1          | 52.5          | 58.2          | 60.0          | 47.2          | 45.4          | 45.4          | 45.0          | 55.6          | 48.4          | 43.2          | 46.2          | ≥43.2 (50.1±5.7)                          |
| Deletions                                             | 1377          | 1312          | 1341          | 1336          | 1311          | 1343          | 1372          | 1339          | 1341          | 1357          | 1338          | 1269          | 1336±29                                   |
| Insertions                                            | 2862          | 2843          | 2828          | 2896          | 2787          | 2819          | 2784          | 2831          | 2784          | 2778          | 2748          | 2785          | 2812±42                                   |
| Duplications                                          | 40            | 47            | 44            | 43            | 29            | 41            | 34            | 36            | 39            | 38            | 29            | 54            | 40±7                                      |
| Inversion breakpoints                                 | 90            | 90            | 81            | 94            | 93            | 94            | 77            | 96            | 87            | 74            | 70            | 72            | 85±10                                     |
| Interchr. translocation breakpoints                   | 2             | 1             | 2             | 2             | 0             | 27            | 29            | 0             | 3             | 3             | 0             | 5             | 6±10                                      |
| Intrachr. translocation breakpoints                   | 0             | 1             | 0             | 0             | 0             | 44            | 23            | 0             | 1             | 0             | 3             | 2             | 6±14                                      |
